# Supplementary material for: A New Method for Estimating Species Age Supports the Coexistence of Malaria Parasites and Their Mammalian Hosts
Source: PubMed Central journal article supplement — Mol Biol Evol. 2015 Jan 13;32(5):1354–64. doi: 10.1093/molbev/msv005 (PMC4408405; doi:10.1093/molbev/msv005), 2015-01-13
Supplement: supp_msv005_Silva_Suppl-Tables-2-3_copy.pdf [file supp_msv005_Silva_Suppl-Tables-2-3_copy.pdf]

**Supplemental Table 2. Ranking of seven positively selected genes.** Ranking information for seven genes hypothesized to evolve under positive selection in *P. falciparum*.

| <i>P. vivax</i> locus identifier | <i>P. falciparum</i> locus identifier | Common name in <i>P. falciparum</i>                    | Dataset     | Dataset size | $d_{AA}$ (Pv-Pk) (%rank) | Residual (%rank) |
|----------------------------------|---------------------------------------|--------------------------------------------------------|-------------|--------------|--------------------------|------------------|
| PVX_002900                       | PFB0570w                              | secreted protein altered thrombospondin repeat protein | PvPk – PfPy | 1018         | 0.20 (73%)               | 0.79 (26%)       |
|                                  |                                       |                                                        | PvPk – PfPr | 280          | 0.20 (84%)               | 6.67 (100%)      |
| PVX_085930                       | PF14_0102                             | rhoptry associated protein                             | PvPk – PfPr | 280          | 0.28 (94%)               | 1.76 (70%)       |
| PVX_099575                       | PFI1145w                              | perforin-like prot                                     | PvPk – PfPy | 1018         | 0.15 (58%)               | 2.24 (65%)       |
| PVX_111175                       | PF10_0303                             | 25 kDa ookinete surface antigen precursor, P25         | PvPk – PfPy | 1018         | 0.30 (90%)               | 0.67 (23%)       |
|                                  |                                       |                                                        | PvPk – PyPc | 260          | 0.30 (93%)               | 0.62 (25%)       |
|                                  |                                       |                                                        | PvPk – PyPb | 497          | 0.30 (93%)               | 2.48 (75%)       |
|                                  |                                       |                                                        | PvPk – PfPr | 280          | 0.30 (95%)               | 3.08 (88%)       |
| PVX_111180                       | PF10_0302                             | 28 kDa ookinete surface protein, P28                   | PvPk – PfPy | 1018         | 0.39 (98%)               | 0.75 (25%)       |
|                                  |                                       |                                                        | PvPk – PyPb | 497          | 0.39 (98%)               | 2.86 (77%)       |
|                                  |                                       |                                                        | PvPk – PfPr | 280          | 0.39 (98%)               | 1.27 (57%)       |
| PVX_123510                       | PFL0800c                              | cell traversal protein for ookinete and sporozoite     | PvPk – PfPr | 280          | 0.17 (77%)               | 1.51 (66%)       |
| PVX_123575                       | PFL0870w                              | thrombospondin-related apical membrane prot            | PvPk – PfPy | 1018         | 0.13 (50%)               | 3.28 (81%)       |
|                                  |                                       |                                                        | PvPk – PyPb | 497          | 0.13 (56%)               | 0.61 (26%)       |

Note: Dataset, the regression dataset in which the gene is present. The same gene may be present in more than one dataset.

**Supplemental Table 3. *P. reichenowi* protein sequence identity between GenBank sequences and those inferred from the draft genome annotation.**

| <b>GenBank ID</b>      | <b>Common name in <i>P. falciparum</i></b>         | <b>Length<br/>(amino acids)</b> | <b>Sequence<br/>identity<br/>(%)</b> |
|------------------------|----------------------------------------------------|---------------------------------|--------------------------------------|
| gb AAA63682.1          | rhoptry associated protein 1                       | 782                             | 100                                  |
| gb AAW72737.1          | thrombospondin related adhesive protein            | 565                             | 100                                  |
| emb CAB89849.1         | cytochrome oxidase I                               | 512                             | 100                                  |
| gb AAX51232.1          | chitinase                                          | 378                             | 100                                  |
| emb CAB89850.1         | cytochrome b                                       | 376                             | 100                                  |
| gb ADB81385.1          | early transcribed membrane protein 10.2            | 355                             | 100                                  |
| gb ABO40224.1          | gamete surface protein Pfs38                       | 354                             | 100                                  |
| gb ACR09945.1          | membrane protein Pf12 precursor-like protein       | 347                             | 100                                  |
| emb CAB65754.1         | merozoite surface protein 3                        | 346                             | 100                                  |
| dbj BAD73968.1         | lactate dehydrogenase                              | 316                             | 100                                  |
| gb ACR09981.1          | merozoite-related surface protein 2                | 282                             | 100                                  |
| ref NP_057944.1        | cytochrome oxidase III                             | 279                             | 100                                  |
| gb AAA29766.1          | sporozoite antigen                                 | 160                             | 100                                  |
| gb ADC94826.1          | dihydrofolate reductase-thymidylate synthase       | 598                             | 99.5                                 |
| emb CAB66387.1         | apical membrane antigen 1                          | 605                             | 99                                   |
| gb ACR09963.1          | MSP7-like prot (merozoite-related surface protein) | 382                             | 97                                   |
| sp P19455.1 OS25_PLARE | 25 kDa ookinete surface antigen precursor (pfs25)  | 217                             | 95.4                                 |
| gb ACR09752.1          | Hypothetical                                       | 202                             | 94.6                                 |
| gb ABU50376.1          | glyceraldehyde-3-phosphate dehydrogenase           | 322                             | 93.9                                 |
